# Supplementary material for: Prevalence and risk factors of computer vision syndrome—assessed in office workers by a validated questionnaire
Source: PeerJ. 2023 Mar 3;11:e14937. doi: 10.7717/peerj.14937 (PMC9987297; doi:10.7717/peerj.14937)
Supplement: Supplemental Information 1 [file peerj-11-14937-s001.xlsx]

## Sheet: Sheet1
ID	Sex	Age	Ocular Pathology	Ocular surgery	Ocular treatment	General treatment	Regular use of optical correction	Regular use of contact lenses	Optical correction to work	Presbyopia	Type of glasses to work	Type of work	Hours VDU to work/day	Years working with VDU	Breaks	Duration of breaks (min)	Air conditioning	Hours use VDU for leisure/day	F1	I1	F2	I2	F3	I3	F4	I4	F5	I5	F6	I6	F7	I7	F8	I8	F9	I9	F10	I10	F11	I11	F12	I12	F13	I13	F14	I14	F15	I15	F16
9	1	38	0	0	0	0	1	0	1	0	1	1	6	13	1	10	2	1	0	0	0	0	0	0	0	0	0	0	0	0	0	0	0	0	0	0	0	0	0	0	1	1	1	1	0	0	1	1	0
20	1	40	1	1	0	0	1	0	1	0	1	1	8	23	1	10	1	4	1	1	0	0	1	1	0	0	0	0	0	0	0	0	0	0	0	0	0	0	0	0	0	0	0	0	0	0	0	0	0
90	1	34	1	0	0	0	0	0	0	0	0	1	4	10	0	0	1	2	0	0	0	0	0	0	0	0	0	0	1	1	0	0	0	0	0	0	1	1	1	1	1	1	0	0	0	0	0	0	1
116	1	24	0	0	0	0	0	0	0	0	0	1	5	3	1	10	2	4	0	0	0	0	1	1	1	1	0	0	0	0	0	0	1	1	0	0	0	0	0	0	0	0	0	0	0	0	0	0	0
119	1	28	0	0	0	0	0	0	0	0	0	1	4	3	1	10	2	4	0	0	0	0	0	0	0	0	0	0	0	0	0	0	0	0	0	0	0	0	0	0	0	0	0	0	0	0	0	0	0
136	1	29	0	0	0	0	0	0	0	0	0	1	7	4	1	15	2	2	0	0	1	1	0	0	0	0	0	0	0	0	0	0	0	0	0	0	0	0	0	0	0	0	0	0	0	0	0	0	0
148	1	28	0	0	0	1	1	2	1	0	1	1	10	8	1	10	2	3	0	0	0	0	0	0	0	0	0	0	0	0	0	0	0	0	0	0	0	0	0	0	0	0	0	0	0	0	0	0	1
154	1	31	0	0	0	0	0	0	0	0	0	1	9	4	0	0	2	2	0	0	1	1	0	0	0	0	0	0	1	1	0	0	0	0	0	0	0	0	0	0	0	0	0	0	0	0	0	0	0
162	1	30	0	0	0	0	1	2	1	0	1	1	4	3	1	15	2	2	0	0	0	0	0	0	0	0	0	0	1	1	0	0	0	0	0	0	0	0	0	0	0	0	0	0	0	0	0	0	1
179	1	37	0	0	0	0	0	0	0	0	0	2	6	8	1	20	2	3	0	0	0	0	0	0	0	0	0	0	0	0	0	0	1	1	0	0	1	1	0	0	0	0	0	0	0	0	0	0	0
186	1	40	0	0	0	0	0	0	0	0	0	2	4	20	1	10	2	2	0	0	0	0	0	0	0	0	0	0	0	0	0	0	1	1	0	0	1	1	0	0	1	1	0	0	1	1	0	0	0
187	1	26	1	0	0	1	1	0	1	0	1	1	5	1	1	10	2	2	0	0	0	0	0	0	0	0	0	0	0	0	0	0	0	0	0	0	0	0	0	0	1	1	0	0	0	0	0	0	0
218	1	31	0	0	0	0	0	0	0	0	0	1	6	3	1	10	2	0	1	1	0	0	0	0	0	0	1	1	1	1	0	0	0	0	1	2	0	0	0	0	0	0	1	1	0	0	0	0	0
250	1	35	0	0	0	1	0	0	0	0	0	1	6	4	1	20	2	2	0	0	0	0	0	0	0	0	0	0	0	0	0	0	0	0	0	0	1	1	0	0	0	0	0	0	0	0	0	0	0
255	1	27	0	0	0	0	1	0	1	0	1	1	8	1	1	2	2	3	0	0	0	0	0	0	0	0	0	0	1	1	0	0	0	0	0	0	1	1	0	0	0	0	0	0	0	0	0	0	0
268	1	31	0	0	0	1	0	0	0	0	0	1	6	3	1	15	2	2	0	0	1	1	0	0	1	1	0	0	0	0	0	0	0	0	0	0	0	0	1	1	0	0	0	0	0	0	0	0	1
275	1	26	0	0	0	1	1	0	1	0	1	1	6	1	1	15	2	1	0	0	0	0	0	0	0	0	2	1	1	1	0	0	1	1	0	0	0	0	0	0	0	0	0	0	0	0	0	0	1
7	1	25	0	0	0	0	0	0	0	0	0	1	7	1	1	10	2	2	0	0	1	1	0	0	0	0	0	0	0	0	0	0	2	1	0	0	2	1	1	1	1	2	0	0	0	0	2	2	1
18	1	33	0	0	0	0	0	0	0	0	0	1	5	6	1	10	2	3	1	1	0	0	0	0	1	2	0	0	1	1	0	0	1	1	2	2	1	1	0	0	0	0	1	1	0	0	1	1	0
61	1	28	1	1	0	0	1	2	1	0	1	1	4	2	1	10	1	3	1	1	0	0	0	0	2	1	0	0	1	1	1	1	2	1	0	0	1	1	0	0	0	0	1	2	1	1	0	0	1
63	1	29	1	1	0	0	1	0	1	0	1	1	4	2	1	10	1	5	1	1	1	1	1	1	1	1	1	2	2	1	1	1	2	1	0	0	1	1	0	0	0	0	1	1	0	0	0	0	0
103	1	26	0	0	0	1	0	0	0	0	0	1	8	1	1	10	2	4	0	0	1	1	0	0	0	0	1	1	1	1	0	0	0	0	0	0	0	0	0	0	1	1	1	1	0	0	0	0	1
177	1	31	0	0	0	0	1	0	1	0	1	2	8	6	1	15	2	2	1	1	0	0	0	0	0	0	1	1	0	0	0	0	1	1	1	1	1	1	0	0	0	0	1	1	0	0	1	1	1
183	1	26	0	0	0	0	1	0	1	0	1	1	3	1	1	10	2	2	0	0	1	1	0	0	0	0	0	0	1	1	0	0	1	1	1	1	0	0	0	0	1	1	0	0	0	0	1	1	0
232	1	34	0	0	0	0	1	0	1	0	1	1	4	7	1	5	2	2	1	1	0	0	1	1	1	1	0	0	0	0	0	0	0	0	0	0	1	1	0	0	0	0	1	1	0	0	1	1	0
240	1	28	0	0	0	0	1	2	1	0	1	1	8	2	1	10	2	2	1	1	1	2	0	0	1	1	1	1	0	0	0	0	0	0	0	0	1	1	0	0	0	0	0	0	0	0	1	1	0
260	1	34	0	0	0	0	0	0	0	0	0	1	6	19	1	10	1	2	0	0	0	0	0	0	1	1	0	0	1	1	0	0	1	2	0	0	1	1	0	0	0	0	0	0	0	0	1	1	1
263	1	30	0	0	0	0	1	2	1	0	1	1	7	10	1	10	2	1	0	0	0	0	0	0	0	0	0	0	0	0	1	1	1	1	0	0	1	1	0	0	0	0	1	1	0	0	1	1	1
264	1	37	0	0	0	0	1	0	1	0	1	1	4	5	1	10	2	1	1	1	1	1	0	0	1	1	0	0	0	0	0	0	0	0	0	0	0	0	1	1	0	0	1	1	0	0	1	1	1
266	1	23	0	0	0	0	0	0	0	0	0	1	4	5	1	5	2	6	2	1	2	1	0	0	0	0	1	1	2	1	0	0	2	2	0	0	1	1	0	0	0	0	2	1	0	0	1	1	2
267	1	37	0	0	0	0	1	0	1	0	1	1	2	12	1	10	2	2	1	1	0	0	0	0	0	0	1	1	0	0	0	0	1	1	0	0	1	1	0	0	2	1	0	0	1	1	0	0	0
288	1	38	1	0	0	0	1	0	1	0	1	1	5	19	1	5	2	2	0	0	1	1	1	1	0	0	1	1	0	0	0	0	1	1	0	0	1	1	1	1	1	1	0	0	1	1	0	0	0
12	2	39	0	0	0	0	1	2	1	0	1	1	6	11	1	5	2	2	1	1	0	0	0	0	1	1	0	0	0	0	0	0	1	1	1	1	0	0	0	0	0	0	0	0	0	0	0	0	1
15	2	40	0	0	0	0	1	2	1	0	1	1	4	19	1	15	2	2	1	1	1	1	0	0	0	0	0	0	1	1	0	0	0	0	1	1	0	0	0	0	0	0	0	0	0	0	0	0	1
22	2	24	0	0	0	0	0	0	0	0	0	1	8	1	0	0	1	2	0	0	0	0	0	0	1	1	1	1	0	0	0	0	0	0	1	1	0	0	0	0	0	0	1	1	0	0	0	0	1
46	2	40	0	0	0	1	0	0	0	0	0	1	4	15	1	10	2	1	0	0	0	0	0	0	0	0	0	0	0	0	0	0	0	0	0	0	0	0	0	0	0	0	0	0	0	0	0	0	0
48	2	34	0	0	0	0	0	0	0	0	0	1	5	9	1	10	2	1	1	1	0	0	0	0	1	1	0	0	0	0	0	0	0	0	0	0	0	0	0	0	1	1	0	0	0	0	1	1	0
111	2	38	0	0	0	0	0	0	0	0	0	1	7	17	1	5	2	2	0	0	0	0	0	0	0	0	0	0	0	0	0	0	1	1	0	0	0	0	0	0	0	0	0	0	0	0	0	0	1
118	2	34	0	0	0	0	0	0	0	0	0	1	5	8	1	10	2	1	0	0	0	0	0	0	0	0	0	0	0	0	0	0	0	0	0	0	0	0	0	0	0	0	0	0	0	0	0	0	1
126	2	26	0	0	0	0	0	0	0	0	0	1	5	1	1	10	2	4	1	1	0	0	0	0	1	1	0	0	0	0	0	0	1	1	0	0	0	0	0	0	0	0	1	1	0	0	1	1	0
180	2	31	1	0	0	0	0	0	0	0	0	1	5	6	1	10	2	2	0	0	1	1	1	1	0	0	0	0	0	0	0	0	1	1	0	0	0	0	0	0	0	0	1	1	0	0	1	1	0
181	2	34	0	0	0	0	0	0	0	0	0	1	4	5	1	10	2	3	0	0	0	0	0	0	0	0	0	0	0	0	0	0	0	0	0	0	1	1	0	0	1	1	0	0	0	0	1	1	0
290	2	30	0	0	0	0	1	0	1	0	1	1	6	10	1	5	1	1	0	0	0	0	0	0	0	0	0	0	0	0	0	0	0	0	0	0	0	0	0	0	0	0	1	1	0	0	1	1	1
3	2	28	0	0	0	1	0	0	0	0	0	1	6	7	1	20	1	4	1	1	1	1	1	1	1	1	0	0	1	1	0	0	1	2	0	0	1	2	1	2	0	0	0	0	0	0	1	1	1
4	2	31	0	0	0	0	1	0	1	0	1	1	5	6	1	10	2	3	2	2	2	2	0	0	1	1	0	0	1	1	0	0	2	1	1	1	1	2	0	0	0	0	1	1	1	1	1	1	2
5	2	30	0	0	0	0	1	0	1	0	1	1	4	5	1	5	2	3	1	1	0	0	0	0	0	0	0	0	1	1	0	0	0	0	0	0	1	1	0	0	1	1	1	1	0	0	0	0	1
13	2	32	0	0	0	1	1	0	1	0	1	1	7	2	1	10	2	2	1	1	1	1	1	1	1	1	0	0	1	1	1	1	1	1	1	1	1	1	0	0	0	0	1	1	0	0	0	0	1
27	2	36	0	0	0	0	1	2	1	0	1	1	7	9	0	0	2	1	1	1	1	1	1	1	1	1	0	0	0	0	0	0	1	1	0	0	1	1	0	0	0	0	0	0	0	0	0	0	1
44	2	31	0	0	0	0	1	2	1	0	1	1	7	12	1	5	2	3	0	0	0	0	0	0	1	1	0	0	1	1	0	0	0	0	1	1	1	1	0	0	1	1	0	0	0	0	1	1	1
51	2	40	0	0	1	0	1	2	1	0	1	1	8	15	1	10	2	3	0	0	0	0	0	0	0	0	1	1	1	1	1	1	0	0	2	2	0	0	0	0	0	0	1	1	0	0	1	1	0
62	2	29	0	0	0	0	0	0	0	0	0	1	5	4	1	10	2	5	1	1	0	0	0	0	1	1	0	0	0	0	0	0	2	1	0	0	1	1	0	0	0	0	1	1	0	0	1	1	1
71	2	40	0	0	0	0	0	0	0	0	0	1	7	12	1	10	2	1	1	1	1	1	0	0	0	0	0	0	1	1	0	0	0	0	1	1	0	0	0	0	0	0	2	1	0	0	0	0	1
80	2	37	0	0	1	0	1	2	1	0	1	1	7	9	1	15	2	2	1	1	0	0	0	0	0	0	1	1	1	1	0	0	1	1	1	1	0	0	0	0	0	0	1	1	0	0	0	0	1
99	2	30	0	0	0	1	1	0	1	0	1	1	8	2	1	10	2	2	1	1	1	1	1	1	0	0	0	0	0	0	0	0	1	1	0	0	2	2	0	0	0	0	2	2	1	1	1	1	1
105	2	38	0	0	0	1	1	0	0	0	0	1	7	13	0	0	2	3	1	1	1	1	1	1	0	0	1	1	1	1	0	0	1	1	0	0	1	1	0	0	0	0	1	1	1	1	1	1	1
112	2	26	0	0	1	1	1	2	1	0	1	1	4	3	0	0	2	2	1	1	1	2	0	0	0	0	1	1	1	1	0	0	1	1	1	1	2	1	1	1	0	0	1	1	0	0	2	2	1
114	2	25	0	0	0	0	1	2	1	0	1	1	6	5	1	30	2	2	2	1	0	0	1	1	1	1	0	0	2	1	1	1	1	1	2	1	0	0	0	0	0	0	1	1	0	0	1	1	2
115	2	25	1	0	0	1	1	0	1	0	1	1	4	3	0	0	2	3	1	1	2	1	0	0	0	0	0	0	1	1	0	0	2	1	2	2	0	0	0	0	0	0	2	2	0	0	0	0	0
117	2	25	0	0	0	0	0	0	0	0	0	1	6	3	1	3	2	2	0	0	0	0	0	0	0	0	1	1	0	0	0	0	1	2	1	1	2	2	0	0	1	1	0	0	0	0	2	2	1
130	2	26	0	0	0	1	1	0	1	0	1	2	3	1	0	0	2	4	1	1	1	1	0	0	0	0	1	1	1	2	0	0	1	1	1	1	1	1	1	1	1	2	0	0	1	1	1	1	2
131	2	29	0	0	0	0	1	2	1	0	1	1	6	8	1	10	1	2	1	1	1	1	1	1	0	0	1	1	0	0	0	0	1	1	1	1	2	2	0	0	0	0	1	1	1	1	1	1	2
150	2	31	0	0	0	1	1	2	1	0	1	1	8	6	0	0	2	2	1	1	0	0	1	1	1	1	0	0	1	1	0	0	0	0	1	1	1	1	0	0	0	0	2	1	0	0	0	0	1
151	2	30	0	0	0	1	1	2	1	0	1	1	7	3	0	0	2	4	0	0	0	0	0	0	1	1	0	0	0	0	0	0	0	0	1	1	1	1	1	1	0	0	2	2	0	0	1	1	1
152	2	31	1	0	0	0	1	0	1	0	1	1	4	4	0	0	2	3	2	1	0	0	2	2	1	1	1	1	2	1	0	0	1	1	2	2	2	1	1	1	1	1	1	1	1	1	1	1	0
153	2	27	0	0	0	0	0	0	0	0	0	1	8	2	1	5	2	3	0	0	0	0	0	0	0	0	0	0	0	0	0	0	1	1	0	0	1	1	0	0	1	1	1	1	0	0	1	1	1
184	2	32	0	0	0	1	1	0	1	0	1	1	5	4	1	5	2	3	1	1	1	1	1	1	1	1	1	1	2	1	1	1	1	1	0	0	1	1	0	0	0	0	1	1	0	0	1	1	1
230	2	38	0	0	0	0	1	2	1	0	1	1	7	10	1	5	2	1	1	1	1	1	0	0	2	1	0	0	0	0	0	0	2	1	1	1	1	1	0	0	1	1	0	0	0	0	1	1	0
245	2	37	0	0	0	1	1	0	1	0	1	1	6	15	1	15	2	1	1	1	1	1	1	1	1	2	0	0	2	1	1	1	1	1	1	2	2	1	0	0	1	1	0	0	1	1	2	1	2
249	2	38	0	0	0	0	1	0	1	0	1	1	7	12	1	15	2	2	0	0	1	1	1	1	1	1	1	1	0	0	0	0	1	1	1	1	0	0	0	0	0	0	0	0	0	0	0	0	1
259	2	36	0	0	0	0	1	0	0	0	0	1	5	10	1	15	2	1	1	1	0	0	2	2	0	0	0	0	1	1	1	1	1	1	1	1	2	1	0	0	1	1	1	1	0	0	2	1	1
261	2	23	0	0	0	1	1	2	1	0	1	1	3	5	1	30	2	1	1	1	1	1	0	0	0	0	0	0	0	0	0	0	2	1	0	0	1	1	1	1	1	1	1	1	0	0	1	1	1
265	2	27	0	0	0	1	0	0	0	0	0	1	4	3	1	15	2	1	0	0	1	1	1	1	1	1	0	0	0	0	0	0	1	1	0	0	0	0	0	0	0	0	0	0	1	1	0	0	1
284	2	37	0	0	0	1	1	0	1	0	1	1	7	12	1	5	1	1	0	0	0	0	1	1	1	1	1	1	2	2	1	1	1	1	2	2	2	2	0	0	1	1	0	0	0	0	1	1	1
294	2	38	0	0	0	0	1	0	0	0	0	1	4	14	1	10	2	2	1	1	0	0	0	0	1	1	0	0	1	1	0	0	1	2	0	0	1	2	1	1	0	0	2	2	0	0	1	2	2
295	2	40	0	0	0	0	1	0	1	0	1	1	4	14	1	5	2	4	1	2	1	1	0	0	1	1	0	0	1	1	0	0	1	1	1	1	0	0	0	0	1	1	2	1	0	0	0	0	1
296	2	40	0	0	0	1	0	0	0	0	0	2	4	10	1	15	2	3	1	1	1	1	1	1	0	0	1	1	0	0	0	0	1	1	0	0	0	0	0	0	1	1	1	1	0	0	1	1	1
64	1	41	0	0	0	0	1	0	1	0	1	1	6	15	1	15	2	1	0	0	1	1	0	0	0	0	0	0	1	1	0	0	0	0	0	0	1	1	0	0	0	0	0	0	0	0	1	1	1
161	1	44	0	0	0	1	0	0	0	0	0	1	2	20	1	15	2	2	0	0	0	0	0	0	0	0	1	1	0	0	0	0	1	1	0	0	0	0	0	0	0	0	0	0	0	0	0	0	0
219	1	43	0	0	0	0	1	0	1	1	4	1	5	20	1	10	2	2	1	1	1	1	0	0	0	0	0	0	0	0	0	0	0	0	0	0	0	0	0	0	0	0	0	0	0	0	0	0	1
6	1	44	0	0	0	0	0	0	0	0	0	1	8	15	1	5	2	1	0	0	0	0	0	0	0	0	0	0	2	1	1	2	0	0	0	0	1	1	0	0	1	1	1	2	0	0	1	1	0
21	1	42	0	0	0	0	1	2	1	0	1	1	7	7	1	10	2	1	1	1	1	2	1	1	1	1	1	1	1	2	1	1	1	1	1	1	1	1	0	0	1	1	1	1	0	0	1	1	1
33	1	41	0	0	0	1	1	2	1	0	1	1	8	16	1	20	2	1	1	1	1	2	1	1	1	1	0	0	0	0	0	0	0	0	0	0	1	1	0	0	1	1	0	0	0	0	1	1	1
34	1	44	0	0	0	0	1	2	1	0	1	1	8	20	0	0	2	3	1	1	0	0	0	0	0	0	0	0	1	1	0	0	1	1	1	1	0	0	0	0	1	1	0	0	0	0	1	1	1
78	1	41	0	0	0	1	0	0	0	0	0	1	3	15	1	5	2	1	0	0	0	0	1	1	1	1	0	0	0	0	1	1	1	1	0	0	1	1	0	0	0	0	1	1	0	0	1	1	1
25	2	43	0	0	0	1	1	2	1	0	1	1	7	19	1	10	2	1	0	0	0	0	0	0	1	1	1	1	0	0	0	0	1	1	0	0	1	1	0	0	0	0	0	0	0	0	1	1	0
2	2	42	1	0	0	0	1	0	0	0	0	1	4	11	1	10	2	1	1	1	1	1	0	0	0	0	0	0	0	0	0	0	1	1	0	0	0	0	0	0	1	1	0	0	1	1	1	1	1
17	2	41	0	0	0	0	1	2	1	0	1	1	5	17	1	5	1	2	1	1	1	2	0	0	0	0	1	1	0	0	1	1	0	0	0	0	1	1	0	0	2	1	1	1	0	0	2	1	1
47	2	44	0	0	0	0	1	0	1	0	1	1	8	8	0	0	2	1	0	0	0	0	0	0	0	0	0	0	0	0	0	0	1	1	0	0	2	2	1	1	2	1	0	0	0	0	2	2	1
49	2	42	0	0	0	0	1	0	1	1	2	1	3	18	1	15	2	1	0	0	0	0	1	1	0	0	1	1	0	0	0	0	0	0	1	1	1	1	0	0	1	1	0	0	0	0	1	1	0
54	2	43	0	0	0	0	1	0	0	0	0	1	7	18	1	1	2	2	0	0	0	0	0	0	1	1	0	0	0	0	0	0	1	1	0	0	1	1	0	0	1	1	0	0	0	0	1	1	1
60	2	41	0	0	1	0	1	2	1	0	1	1	6	15	1	10	2	1	1	1	0	0	1	1	1	1	0	0	1	1	1	1	0	0	2	2	0	0	0	0	0	0	2	2	0	0	1	1	1
127	2	43	0	0	0	1	1	0	1	0	1	1	7	15	1	10	1	2	1	1	0	0	1	1	0	0	0	0	0	0	0	0	1	1	1	1	2	1	1	1	1	1	2	2	0	0	1	1	2
129	2	42	0	0	0	0	0	0	1	0	1	1	8	18	1	20	2	2	1	1	1	1	1	1	0	0	0	0	2	1	0	0	0	0	1	1	0	0	0	0	0	0	0	0	0	0	0	0	1
166	2	43	0	0	0	0	0	0	1	0	1	1	7	19	0	0	2	1	1	2	1	1	1	2	1	1	0	0	1	1	1	2	1	1	1	2	1	1	0	0	2	1	1	1	0	0	1	1	1
293	2	43	0	0	0	1	1	0	1	0	1	1	6	18	1	10	2	1	0	0	1	1	1	1	0	0	0	0	0	0	1	1	1	1	1	1	1	1	0	0	0	0	0	0	0	0	1	1	1
32	1	54	0	0	0	0	1	0	1	1	3	1	5	15	0	0	1	1	0	0	0	0	0	0	0	0	0	0	0	0	0	0	0	0	0	0	1	1	0	0	2	1	0	0	0	0	1	1	0
43	1	65	0	0	0	1	0	0	0	1	0	1	8	30	1	10	2	0	0	0	0	0	0	0	0	0	0	0	0	0	0	0	0	0	0	0	0	0	0	0	2	1	0	0	0	0	0	0	0
83	1	62	0	0	0	1	1	0	1	1	2	2	8	34	1	30	2	0	0	0	1	1	0	0	0	0	0	0	0	0	0	0	0	0	0	0	1	1	0	0	0	0	0	0	0	0	1	1	0
94	1	55	0	0	0	0	1	0	1	1	2	2	3	23	1	10	2	0	1	1	1	1	0	0	1	1	0	0	1	1	0	0	0	0	0	0	0	0	0	0	1	1	0	0	0	0	0	0	0
96	1	56	0	0	0	1	1	0	1	1	2	2	4	30	1	10	1	2	0	0	0	0	0	0	0	0	0	0	1	1	0	0	1	1	0	0	1	1	0	0	0	0	0	0	0	0	0	0	0
100	1	63	0	0	0	1	1	0	1	1	2	1	4	29	1	30	1	3	0	0	0	0	0	0	1	1	0	0	0	0	0	0	0	0	0	0	0	0	0	0	0	0	0	0	0	0	0	0	0
101	1	54	0	0	0	0	1	0	1	1	3	1	5	25	1	15	2	2	1	1	1	1	0	0	1	1	0	0	1	1	0	0	0	0	0	0	0	0	0	0	0	0	1	1	0	0	0	0	0
128	1	58	0	0	0	0	0	0	0	1	0	1	5	18	1	5	1	1	0	0	0	0	0	0	0	0	0	0	0	0	0	0	0	0	0	0	0	0	0	0	1	1	0	0	0	0	0	0	0
139	1	59	0	0	0	1	0	0	1	1	3	1	5	30	1	15	2	2	1	1	0	0	0	0	1	1	0	0	1	1	0	0	0	0	0	0	1	1	0	0	1	1	0	0	0	0	0	0	0
146	1	60	0	0	0	0	1	0	1	1	2	1	6	40	1	5	2	2	1	1	1	1	0	0	1	1	0	0	0	0	0	0	0	0	1	1	0	0	0	0	0	0	1	1	0	0	0	0	0
147	1	51	0	0	0	0	1	0	1	1	2	1	8	30	1	3	2	3	1	1	0	0	0	0	0	0	0	0	0	0	0	0	0	0	0	0	1	1	1	1	0	0	1	1	0	0	1	1	0
159	1	54	0	0	0	1	1	0	1	1	1	1	6	25	1	15	1	3	0	0	0	0	0	0	0	0	0	0	1	1	0	0	0	0	0	0	0	0	0	0	0	0	0	0	0	0	0	0	0
174	1	54	0	0	0	1	1	2	1	1	1	2	7	20	1	10	2	4	0	0	0	0	0	0	0	0	0	0	0	0	0	0	0	0	1	1	0	0	0	0	1	1	2	1	0	0	0	0	0
175	1	57	0	0	0	1	1	0	1	1	2	2	7	32	1	5	2	0	0	0	0	0	0	0	0	0	0	0	0	0	0	0	0	0	0	0	0	0	0	0	0	0	1	1	0	0	0	0	0
178	1	45	0	0	0	1	0	0	0	0	0	2	8	19	1	10	2	2	0	0	1	1	0	0	0	0	1	1	0	0	0	0	1	1	0	0	0	0	0	0	0	0	1	1	0	0	0	0	0
195	1	49	0	0	0	0	1	0	0	1	0	2	5	18	1	15	2	2	0	0	0	0	0	0	0	0	0	0	0	0	0	0	0	0	0	0	0	0	0	0	0	0	0	0	0	0	0	0	0
199	1	47	0	0	0	0	0	0	0	1	0	2	4	15	1	30	2	1	0	0	0	0	0	0	0	0	0	0	1	1	0	0	0	0	0	0	1	1	0	0	1	1	0	0	0	0	1	1	1
213	1	45	0	0	0	1	0	0	0	0	0	1	5	23	1	10	2	2	0	0	0	0	0	0	0	0	0	0	0	0	0	0	0	0	0	0	0	0	0	0	0	0	0	0	0	0	0	0	0
217	1	59	0	0	0	1	1	0	0	1	0	1	6	30	1	10	1	2	0	0	0	0	0	0	0	0	0	0	1	1	0	0	0	0	0	0	1	2	0	0	1	1	0	0	0	0	1	1	1
228	1	47	1	0	0	0	0	0	0	1	0	1	6	21	0	0	1	1	0	0	0	0	0	0	0	0	0	0	0	0	0	0	0	0	0	0	0	0	0	0	0	0	0	0	0	0	0	0	0
247	1	47	0	0	0	0	1	0	1	1	2	1	6	10	1	5	2	1	0	0	0	0	0	0	0	0	0	0	0	0	0	0	0	0	1	1	0	0	0	0	2	1	0	0	0	0	1	1	1
279	1	53	0	0	0	1	1	0	0	1	0	1	5	19	1	5	2	1	0	0	0	0	0	0	0	0	0	0	0	0	0	0	0	0	0	0	1	1	0	0	1	1	0	0	0	0	0	0	0
281	1	50	0	0	0	0	1	2	1	1	1	1	4	24	1	15	2	2	0	0	0	0	0	0	0	0	0	0	1	1	0	0	0	0	0	0	0	0	0	0	0	0	0	0	0	0	0	0	1
1	1	60	0	0	0	0	1	0	1	1	2	1	5	30	0	0	1	2	0	0	0	0	0	0	1	1	0	0	0	0	0	0	0	0	0	0	0	0	1	1	2	1	0	0	0	0	2	2	1
37	1	63	0	0	0	1	1	0	1	1	3	1	4	29	0	0	2	2	1	1	1	1	0	0	1	1	2	1	1	1	0	0	0	0	1	1	0	0	0	0	1	1	2	1	0	0	1	1	2
42	1	49	0	0	0	1	1	0	1	1	1	1	8	23	1	10	2	3	1	1	1	1	0	0	0	0	0	0	0	0	0	0	0	0	1	1	1	1	0	0	1	1	0	0	0	0	0	0	1
66	1	52	0	0	0	0	1	0	1	1	3	1	6	14	1	5	2	3	0	0	1	1	1	1	1	1	1	1	0	0	0	0	1	1	0	0	2	1	1	1	2	2	0	0	1	1	1	1	1
68	1	66	0	0	0	1	1	0	1	1	2	1	5	28	1	15	2	1	1	1	1	1	0	0	0	0	0	0	1	1	0	0	0	0	0	0	1	1	1	1	1	1	1	1	1	1	0	0	0
98	1	48	0	0	0	0	0	0	0	1	0	2	6	10	1	10	1	0	1	1	1	1	1	1	0	0	0	0	1	1	0	0	1	1	1	1	0	0	0	0	1	1	1	1	0	0	0	0	1
122	1	51	0	0	0	0	1	0	1	1	1	1	6	21	1	10	2	3	1	1	1	1	0	0	1	1	0	0	1	1	0	0	1	1	0	0	0	0	0	0	0	0	1	1	0	0	0	0	0
125	1	51	0	0	0	0	1	0	0	1	0	1	6	20	1	15	2	1	0	0	1	1	1	1	0	0	1	1	0	0	0	0	1	1	1	1	1	1	0	0	2	1	1	1	0	0	2	1	0
133	1	57	1	1	0	1	1	0	0	1	0	1	8	18	1	10	2	3	2	1	1	1	0	0	0	0	1	1	1	1	0	0	1	1	0	0	1	1	2	1	0	0	1	1	1	1	1	1	0
142	1	46	0	0	0	0	1	0	1	1	1	1	10	26	1	10	2	1	1	1	0	0	0	0	0	0	0	0	1	1	0	0	1	1	0	0	1	1	0	0	1	1	1	1	0	0	0	0	1
144	1	52	0	0	0	1	1	0	1	1	3	1	4	30	0	0	2	5	1	1	1	1	0	0	1	1	1	1	1	1	0	0	1	1	1	1	1	1	0	0	1	1	1	1	0	0	1	1	1
145	1	50	0	0	0	0	1	0	1	1	4	1	5	20	1	4	2	1	1	1	0	0	1	1	1	1	0	0	1	1	0	0	0	0	1	1	1	1	0	0	1	1	1	1	0	0	1	1	0
155	1	46	0	0	0	0	1	0	1	1	2	2	3	1	1	10	2	1	0	0	1	1	0	0	0	0	1	1	1	1	0	0	1	1	1	1	0	0	0	0	2	1	0	0	0	0	1	1	1
158	1	54	0	0	0	1	1	0	1	1	3	1	6	30	1	10	2	2	0	0	1	1	0	0	1	1	0	0	0	0	0	0	0	0	0	0	1	1	1	1	1	1	0	0	0	0	1	1	1
170	1	51	0	0	0	1	1	0	1	1	2	1	8	20	1	10	1	2	1	1	1	1	1	1	1	1	0	0	1	1	0	0	0	0	1	1	1	1	0	0	0	0	0	0	0	0	1	1	0
173	1	48	0	0	0	0	1	0	1	1	1	2	7	15	1	10	2	2	1	1	1	1	0	0	0	0	0	0	1	1	0	0	0	0	1	1	1	1	0	0	1	1	0	0	0	0	1	1	0
208	1	54	0	0	0	0	1	0	1	1	4	1	4	19	1	15	2	1	1	1	0	0	0	0	1	1	0	0	0	0	0	0	1	1	0	0	0	0	0	0	1	1	1	1	0	0	1	1	0
210	1	45	0	0	0	0	1	0	1	0	1	1	6	10	1	10	2	3	1	1	1	1	1	1	1	1	1	1	0	0	0	0	0	0	1	1	0	0	0	0	0	0	1	1	0	0	0	0	0
242	1	52	0	0	0	1	1	0	0	1	0	1	6	15	1	20	2	1	1	1	1	1	0	0	1	1	0	0	1	1	0	0	0	0	1	1	1	1	0	0	1	1	1	1	0	0	1	1	0
243	1	45	0	0	0	1	1	0	1	0	1	1	8	18	0	0	2	1	0	0	1	1	1	1	0	0	0	0	0	0	0	0	0	0	0	0	1	1	0	0	1	1	0	0	0	0	1	1	1
269	1	56	0	0	0	1	1	0	1	1	2	1	7	8	1	5	2	1	0	0	1	1	0	0	0	0	0	0	1	1	0	0	0	0	1	1	1	1	0	0	0	0	0	0	0	0	1	1	1
272	1	51	0	0	0	0	1	0	0	1	0	2	7	11	1	15	2	1	0	0	1	1	0	0	0	0	0	0	1	1	0	0	1	1	0	0	1	1	0	0	1	1	0	0	0	0	0	0	2
10	2	48	0	0	0	0	1	0	0	1	0	1	5	14	1	15	2	2	0	0	0	0	0	0	0	0	0	0	0	0	0	0	1	1	0	0	1	1	0	0	0	0	0	0	0	0	1	1	0
11	2	54	0	0	0	0	1	2	1	1	3	1	7	10	1	10	2	1	1	1	1	1	0	0	0	0	0	0	0	0	0	0	0	0	0	0	0	0	0	0	0	0	0	0	0	0	0	0	1
23	2	56	0	0	0	0	1	2	0	1	0	1	8	18	0	0	1	1	0	0	0	0	0	0	0	0	0	0	0	0	0	0	0	0	0	0	1	1	0	0	1	1	0	0	0	0	0	0	0
28	2	58	0	0	0	0	1	0	1	1	2	1	5	20	1	5	2	1	0	0	0	0	0	0	0	0	1	1	0	0	0	0	1	1	0	0	0	0	0	0	1	1	0	0	0	0	0	0	0
30	2	53	0	0	0	0	1	0	1	1	2	1	4	27	0	0	2	3	0	0	0	0	0	0	0	0	0	0	0	0	0	0	0	0	0	0	1	1	0	0	1	1	0	0	0	0	1	1	0
36	2	51	1	1	0	0	1	0	1	1	2	1	7	25	0	0	1	1	0	0	0	0	0	0	0	0	0	0	0	0	0	0	0	0	0	0	0	0	0	0	2	1	1	1	0	0	0	0	1
41	2	61	0	0	0	0	1	0	1	1	2	1	6	20	0	0	2	1	0	0	0	0	0	0	0	0	0	0	0	0	0	0	0	0	0	0	0	0	0	0	0	0	0	0	0	0	0	0	1
56	2	48	1	1	0	0	1	2	1	1	4	1	5	18	1	10	2	1	0	0	0	0	0	0	1	1	0	0	0	0	0	0	0	0	1	1	1	1	0	0	0	0	0	0	0	0	0	0	0
67	2	48	0	0	0	0	1	0	1	1	4	1	5	15	1	5	1	1	0	0	0	0	0	0	0	0	0	0	0	0	0	0	0	0	1	1	0	0	0	0	1	1	1	1	0	0	1	1	0
88	2	52	1	0	0	0	1	0	1	1	2	2	6	24	1	5	2	0	0	0	0	0	0	0	0	0	0	0	0	0	0	0	1	1	0	0	1	1	0	0	0	0	1	1	0	0	0	0	1
141	2	56	0	0	0	0	1	0	1	1	3	1	5	19	1	5	2	1	0	0	0	0	0	0	0	0	0	0	0	0	0	0	0	0	0	0	1	1	0	0	0	0	0	0	0	0	1	1	1
196	2	50	0	0	0	1	0	0	0	1	0	2	5	25	1	10	2	2	0	0	0	0	0	0	0	0	0	0	0	0	0	0	1	1	0	0	0	0	0	0	0	0	0	0	0	0	0	0	0
206	2	51	1	0	0	0	1	0	1	1	1	1	6	5	1	5	2	1	0	0	0	0	0	0	0	0	0	0	1	1	0	0	0	0	0	0	0	0	0	0	0	0	1	1	0	0	1	1	0
211	2	50	0	0	0	1	1	2	1	1	1	1	5	10	1	20	2	1	0	0	0	0	0	0	0	0	0	0	0	0	0	0	0	0	1	1	1	1	0	0	2	1	0	0	0	0	0	0	0
212	2	45	0	0	0	0	1	0	1	0	1	1	6	21	1	10	2	1	0	0	0	0	0	0	0	0	0	0	0	0	0	0	1	1	1	1	1	1	0	0	0	0	1	1	0	0	0	0	1
246	2	57	0	0	0	0	1	0	1	1	2	1	8	18	1	10	2	9	0	0	0	0	0	0	0	0	0	0	0	0	0	0	0	0	0	0	0	0	0	0	0	0	0	0	0	0	0	0	0
253	2	53	0	0	0	1	1	0	1	1	3	1	8	8	1	5	2	2	0	0	0	0	0	0	1	1	0	0	0	0	0	0	0	0	0	0	1	1	0	0	0	0	1	1	0	0	0	0	0
257	2	51	0	0	0	1	1	0	1	1	3	1	5	3	1	10	2	1	0	0	0	0	0	0	0	0	0	0	0	0	0	0	0	0	0	0	0	0	0	0	0	0	1	1	0	0	0	0	0
270	2	55	0	0	0	1	1	0	1	1	2	2	6	19	1	10	1	3	0	0	1	1	0	0	0	0	0	0	0	0	0	0	1	1	1	1	0	0	0	0	0	0	0	0	0	0	0	0	1
278	2	45	0	0	0	0	1	0	0	0	0	1	4	11	1	5	1	2	0	0	0	0	0	0	0	0	0	0	0	0	0	0	0	0	0	0	0	0	0	0	0	0	0	0	0	0	0	0	0
286	2	52	0	0	0	0	1	0	0	1	0	1	6	22	1	5	2	1	0	0	0	0	0	0	1	1	0	0	0	0	0	0	1	1	0	0	1	1	0	0	0	0	1	1	0	0	0	0	0
291	2	45	0	0	0	1	1	0	0	0	0	1	5	20	1	5	2	1	1	1	1	1	0	0	1	1	0	0	1	1	0	0	0	0	1	1	0	0	0	0	0	0	0	0	0	0	0	0	0
292	2	56	0	1	0	1	1	2	0	1	0	1	6	20	0	0	2	1	0	0	0	0	0	0	0	0	0	0	0	0	0	0	0	0	0	0	0	0	0	0	0	0	0	0	0	0	0	0	1
8	2	46	0	0	0	0	1	0	1	1	1	1	6	19	0	0	1	1	0	0	0	0	0	0	0	0	1	1	0	0	0	0	0	0	1	1	2	2	1	1	2	1	1	1	0	0	2	1	0
14	2	59	0	0	0	1	1	0	1	1	2	1	7	33	0	0	2	2	1	1	0	0	0	0	2	2	0	0	0	0	0	0	1	1	1	1	1	1	1	1	1	1	0	0	1	1	1	1	1
29	2	46	0	0	0	0	1	0	1	1	2	1	5	23	0	0	2	1	1	1	0	0	0	0	0	0	0	0	1	1	0	0	0	0	1	1	1	1	1	1	1	1	0	0	0	0	1	1	0
31	2	54	0	0	0	0	1	0	1	1	2	1	6	17	1	10	1	2	1	1	0	0	0	0	0	0	0	0	0	0	0	0	2	1	0	0	2	1	0	0	2	1	2	2	0	0	1	1	0
40	2	45	0	0	0	0	1	2	1	0	1	1	7	13	0	0	2	1	1	1	0	0	0	0	1	1	0	0	0	0	0	0	1	1	2	1	1	1	0	0	1	1	2	1	1	1	1	1	0
45	2	50	0	0	0	0	1	0	1	1	4	2	5	3	1	30	2	2	2	1	1	1	1	1	1	1	1	1	1	1	0	0	1	1	0	0	2	1	1	1	2	1	1	1	1	1	1	1	1
52	2	47	0	0	0	1	1	2	1	1	1	1	6	21	1	5	2	2	0	0	0	0	0	0	0	0	0	0	0	0	0	0	0	0	0	0	1	1	1	1	1	1	1	1	1	1	1	1	0
55	2	59	0	0	0	0	1	0	1	1	4	1	5	34	1	10	2	2	1	2	1	1	1	1	2	2	0	0	1	1	0	0	0	0	1	1	2	1	2	1	2	1	0	0	1	1	2	1	0
69	2	60	0	0	0	0	1	0	1	1	2	1	5	22	1	5	2	1	1	1	1	1	0	0	0	0	0	0	1	1	0	0	1	1	1	1	0	0	0	0	0	0	1	1	0	0	0	0	1
72	2	45	0	0	0	0	1	0	1	0	1	1	8	17	1	15	2	2	1	1	0	0	1	1	0	0	0	0	0	0	1	1	0	0	0	0	1	2	0	0	2	1	2	2	0	0	1	1	2
73	2	54	1	0	0	0	1	0	1	1	3	1	4	28	1	15	2	1	1	1	0	0	2	1	1	1	0	0	1	1	0	0	0	0	0	0	1	2	0	0	2	1	2	1	0	0	2	2	0
77	2	57	0	0	0	1	0	0	0	1	0	1	8	20	1	15	2	1	2	1	1	1	0	0	0	0	0	0	1	1	0	0	2	2	1	1	1	1	0	0	1	1	1	1	0	0	1	1	1
84	2	51	0	0	0	1	1	0	1	1	3	2	6	7	1	10	2	0	1	1	1	1	1	2	0	0	1	1	0	0	0	0	0	0	1	1	1	1	1	1	0	0	1	1	0	0	1	1	2
85	2	58	0	0	0	1	1	0	1	1	3	2	8	22	0	0	2	3	1	1	1	1	1	1	1	1	1	1	1	1	1	1	2	1	2	2	2	1	0	0	2	1	1	1	1	1	2	1	1
86	2	49	1	1	0	1	1	0	0	1	0	1	3	25	1	30	2	2	1	1	1	1	2	2	1	1	0	0	1	1	0	0	1	1	2	2	1	1	2	2	1	1	2	2	0	0	1	1	1
87	2	50	1	0	0	0	1	0	1	1	2	2	4	18	1	20	2	4	1	2	1	1	0	0	1	2	1	1	1	2	0	0	1	1	2	1	1	1	0	0	2	2	1	2	1	1	1	1	1
89	2	56	1	0	1	1	1	0	0	1	0	2	7	24	1	5	2	0	2	1	2	1	1	1	1	1	1	2	2	1	1	1	1	1	2	1	0	0	0	0	1	1	2	2	1	1	1	2	1
91	2	64	0	0	0	0	1	0	1	1	3	2	3	15	1	10	2	1	1	1	1	1	0	0	1	1	0	0	1	1	0	0	0	0	1	1	0	0	0	0	0	0	1	1	0	0	0	0	0
92	2	67	0	0	1	0	1	0	1	1	4	2	6	13	1	10	2	0	2	1	1	1	1	1	2	2	0	0	1	1	0	0	0	0	2	1	1	1	1	1	1	2	2	2	0	0	1	1	2
97	2	53	0	0	0	0	1	0	1	1	1	2	6	14	1	10	2	1	1	1	1	1	0	0	0	0	0	0	0	0	0	0	1	1	0	0	2	1	1	1	1	1	2	2	1	1	2	1	1
104	2	61	0	0	0	1	1	0	1	1	2	1	4	25	1	10	2	1	1	1	1	1	1	1	0	0	1	1	0	0	0	0	1	1	0	0	0	0	0	0	0	0	1	1	0	0	0	0	1
108	2	47	0	0	0	0	1	2	1	1	1	1	7	13	0	0	2	0	0	0	1	1	0	0	1	1	1	1	1	1	0	0	1	1	0	0	0	0	0	0	1	2	1	1	0	0	1	1	1
109	2	53	0	0	0	1	0	0	1	1	4	1	8	34	1	5	1	2	1	1	1	1	0	0	0	0	0	0	1	1	0	0	1	1	1	1	1	1	0	0	1	1	0	0	0	0	1	1	1
110	2	46	0	0	0	0	1	2	1	1	1	1	8	15	1	5	2	1	1	1	1	1	0	0	1	1	0	0	1	1	0	0	0	0	1	1	0	0	0	0	0	0	1	1	0	0	2	1	1
132	2	49	0	0	0	1	1	0	1	1	4	1	2	28	0	0	2	2	0	0	0	0	1	1	0	0	0	0	0	0	0	0	0	0	1	1	1	2	0	0	0	0	1	1	0	0	1	1	1
134	2	60	0	0	0	1	1	0	1	1	2	1	6	32	1	10	2	0	1	1	1	1	2	1	0	0	1	1	2	1	0	0	1	1	2	2	1	1	0	0	2	2	2	2	1	1	1	1	0
137	2	50	0	0	0	0	1	0	0	1	0	1	6	25	1	5	2	1	1	1	2	1	1	1	0	0	1	1	0	0	0	0	1	1	2	2	2	1	0	0	2	2	1	2	0	0	2	1	0
143	2	61	0	0	0	1	1	0	1	1	2	1	6	27	1	10	2	1	0	0	2	1	1	1	0	0	0	0	1	1	1	1	1	1	0	0	1	1	0	0	1	1	0	0	0	0	1	1	1
156	2	56	1	1	0	1	0	0	1	1	4	1	7	25	0	0	2	1	0	0	1	1	0	0	1	1	0	0	0	0	0	0	1	1	0	0	2	1	0	0	2	2	1	1	0	0	1	1	2
168	2	48	0	0	0	0	1	2	1	1	3	1	8	21	1	15	1	1	1	1	1	1	0	0	1	1	0	0	0	0	0	0	0	0	1	1	1	1	0	0	1	1	1	1	0	0	1	1	1
169	2	53	1	0	0	0	0	0	0	1	0	1	7	24	0	0	2	1	1	1	1	1	1	1	1	1	0	0	1	1	0	0	2	1	1	1	2	1	2	1	1	1	2	1	1	1	2	1	2
171	2	53	0	0	0	0	1	0	1	1	1	1	7	25	1	10	2	1	1	1	1	1	0	0	0	0	0	0	1	1	0	0	0	0	0	0	1	1	0	0	1	1	1	1	0	0	1	1	1
172	2	54	0	0	0	1	1	0	1	1	3	2	8	30	1	10	2	2	2	1	1	1	0	0	0	0	0	0	0	0	1	1	1	1	0	0	1	1	0	0	2	1	1	1	0	0	2	1	0
176	2	62	0	0	0	0	1	0	1	1	4	2	6	30	1	15	2	1	0	0	0	0	0	0	0	0	0	0	1	1	0	0	1	1	1	1	1	1	0	0	1	1	1	1	1	1	1	1	0
188	2	55	0	0	0	0	1	0	1	1	3	2	4	25	1	10	2	1	0	0	1	1	0	0	1	1	2	1	0	0	0	0	1	1	1	2	1	1	1	1	1	1	0	0	0	0	1	1	1
190	2	49	0	0	0	0	1	0	1	1	2	2	6	15	1	10	2	0	1	1	0	0	0	0	0	0	1	1	0	0	0	0	0	0	1	1	0	0	0	0	2	2	1	1	0	0	1	1	1
191	2	54	1	0	0	1	1	0	1	1	2	2	6	35	1	10	2	1	1	1	0	0	1	1	1	1	1	1	1	1	1	1	0	0	1	1	2	1	0	0	2	1	0	0	0	0	2	2	0
192	2	60	0	0	0	0	1	0	1	1	2	2	8	30	1	15	2	1	2	1	1	1	1	1	0	0	0	0	1	1	0	0	2	1	1	1	2	1	0	0	1	1	2	1	0	0	1	1	1
193	2	54	0	0	0	1	1	0	0	1	0	2	6	31	1	10	2	2	2	1	0	0	0	0	1	1	0	0	0	0	0	0	2	2	2	2	2	1	1	1	2	1	1	1	0	0	2	2	1
194	2	59	0	0	0	1	1	0	1	1	3	2	5	20	1	15	2	1	1	1	0	0	0	0	1	1	0	0	0	0	0	0	1	1	0	0	2	1	2	1	1	1	0	0	1	1	1	1	2
197	2	62	0	0	0	1	1	0	1	1	2	2	7	30	1	10	2	1	2	1	0	0	1	1	1	1	2	1	0	0	0	0	1	2	0	0	1	1	0	0	1	1	1	1	0	0	0	0	0
203	2	51	0	0	0	1	1	0	1	1	2	2	7	13	1	10	2	1	0	0	0	0	0	0	1	1	0	0	1	1	0	0	0	0	1	1	1	1	0	0	1	1	0	0	1	2	0	0	1
205	2	56	0	0	0	1	1	0	1	1	3	1	6	35	1	5	2	1	1	1	1	1	0	0	0	0	0	0	0	0	0	0	0	0	1	1	1	1	0	0	1	1	0	0	0	0	1	1	0
207	2	60	0	0	0	1	1	0	1	1	5	1	4	30	1	10	2	2	2	2	1	1	1	1	0	0	0	0	2	2	0	0	0	0	1	1	1	1	1	1	0	0	0	0	0	0	1	1	1
209	2	47	0	0	0	0	1	2	1	1	4	1	7	10	1	10	2	1	1	1	0	0	0	0	0	0	1	1	0	0	0	0	1	1	1	1	2	1	1	1	2	1	0	0	0	0	2	1	1
215	2	49	0	0	0	0	1	0	1	1	2	1	8	20	1	15	2	1	2	1	1	1	0	0	1	1	2	1	2	1	0	0	2	2	0	0	1	1	0	0	2	1	1	1	0	0	2	1	1
216	2	61	0	0	0	0	1	0	1	1	4	1	7	17	1	10	2	1	1	1	1	1	0	0	0	0	1	2	1	1	0	0	0	0	1	1	2	1	0	0	1	1	0	0	0	0	1	1	0
221	2	48	0	0	0	1	1	2	1	1	1	1	6	18	1	5	2	1	0	0	1	1	0	0	1	1	1	1	1	1	0	0	0	0	1	1	1	1	0	0	0	0	0	0	0	0	1	1	1
222	2	63	0	0	0	1	1	0	1	1	2	1	6	29	1	10	2	1	1	1	1	1	0	0	2	1	2	1	1	1	0	0	2	1	2	1	2	1	0	0	0	0	2	1	1	1	2	1	0
223	2	60	0	0	0	0	1	0	1	1	2	1	6	20	1	10	2	1	2	1	2	2	2	1	2	1	1	2	1	1	0	0	2	1	0	0	2	1	2	1	2	1	1	2	1	1	2	2	1
224	2	54	0	1	0	0	1	0	1	1	3	1	7	30	1	5	2	1	1	1	0	0	1	1	0	0	0	0	1	1	0	0	0	0	1	1	0	0	0	0	0	0	2	1	0	0	1	1	1
225	2	49	0	0	0	0	1	0	1	1	1	1	6	16	1	10	2	1	1	1	0	0	0	0	1	1	0	0	1	1	0	0	1	1	0	0	1	1	0	0	1	1	1	1	0	0	0	0	0
226	2	46	0	0	0	1	1	0	1	1	1	1	5	20	1	10	1	4	1	1	1	1	0	0	0	0	1	1	0	0	0	0	1	1	2	1	1	1	0	0	2	2	0	0	1	1	1	1	1
227	2	49	0	0	0	0	1	2	1	1	1	1	6	21	1	10	1	3	1	1	1	1	0	0	0	0	1	1	2	1	0	0	0	0	1	1	1	1	1	1	1	1	0	0	0	0	1	1	0
233	2	57	0	0	0	1	1	0	1	1	2	1	5	20	1	5	2	1	2	1	2	1	1	1	0	0	0	0	0	0	0	0	1	1	0	0	2	1	0	0	1	1	0	0	0	0	1	1	0
234	2	52	0	0	0	0	1	2	1	1	1	1	8	30	1	10	1	1	1	1	0	0	1	1	1	1	1	1	0	0	0	0	1	1	0	0	2	1	2	1	1	1	1	1	1	1	1	1	1
235	2	45	0	0	0	1	1	0	1	0	1	1	4	18	1	10	2	1	1	1	0	0	0	0	1	1	0	0	0	0	0	0	1	1	1	1	0	0	0	0	0	0	1	1	0	0	1	1	0
236	2	46	0	0	0	1	1	0	0	1	0	1	4	22	1	5	2	1	1	1	1	1	1	2	0	0	1	1	0	0	0	0	0	0	1	1	2	1	0	0	2	1	1	1	1	1	1	1	1
237	2	65	0	0	0	1	1	0	1	1	4	1	6	27	1	15	2	1	2	1	2	1	0	0	2	2	1	1	1	1	1	1	0	0	0	0	1	1	0	0	1	1	2	2	0	0	2	1	1
239	2	55	0	0	0	0	1	0	1	1	3	1	6	30	1	10	1	1	0	0	0	0	1	2	2	1	0	0	0	0	0	0	1	1	1	2	2	1	1	1	2	2	2	2	1	1	2	2	0
244	2	55	0	0	0	1	1	0	1	1	2	1	5	28	1	10	1	1	1	1	1	1	0	0	0	0	0	0	0	0	1	1	0	0	1	1	0	0	0	0	0	0	0	0	0	0	1	1	1
248	2	53	0	0	0	0	1	0	1	1	3	1	7	30	1	5	2	2	2	2	2	2	2	2	2	2	1	1	0	0	0	0	0	0	2	2	2	2	0	0	2	2	2	2	0	0	2	2	0
251	2	52	0	0	0	0	1	0	1	1	3	1	6	20	1	10	2	1	2	1	0	0	0	0	0	0	0	0	1	1	0	0	0	0	0	0	2	2	0	0	2	2	0	0	0	0	2	1	1
254	2	57	0	0	0	0	1	0	1	1	2	1	6	29	1	10	2	1	0	0	0	0	0	0	1	1	0	0	0	0	0	0	1	1	1	1	1	1	0	0	1	1	1	1	0	0	0	0	0
256	2	53	0	0	0	0	1	0	1	1	2	2	6	32	1	5	2	1	1	1	1	1	1	1	0	0	1	1	1	1	0	0	2	1	1	1	1	1	1	1	1	1	1	1	1	1	1	1	1
258	2	58	0	0	0	0	1	0	1	1	3	1	6	25	1	10	2	2	0	0	0	0	1	1	0	0	0	0	0	0	0	0	0	0	0	0	1	1	0	0	2	2	1	1	0	0	2	2	1
271	2	55	0	0	0	0	1	0	1	1	2	2	7	11	1	15	2	2	1	1	0	0	0	0	1	1	0	0	1	1	0	0	0	0	0	0	1	1	0	0	0	0	1	1	0	0	1	1	0
273	2	49	0	0	0	0	1	0	1	1	3	2	7	12	1	15	2	2	0	0	0	0	1	1	0	0	0	0	1	1	0	0	0	0	0	0	2	1	0	0	0	0	2	2	0	0	1	1	0
274	2	49	0	0	0	0	1	0	1	1	3	2	7	18	1	15	2	1	0	0	0	0	1	1	0	0	0	0	1	1	0	0	2	2	2	2	2	2	0	0	2	2	2	2	0	0	2	2	1
276	2	54	0	0	0	1	1	0	1	1	2	2	7	11	1	15	2	1	0	0	0	0	0	0	1	1	0	0	0	0	0	0	2	1	0	0	2	1	0	0	1	1	0	0	0	0	1	1	1
277	2	48	0	0	0	1	0	0	0	1	0	1	5	12	1	5	2	1	1	1	0	0	0	0	0	0	1	2	0	0	0	0	1	2	1	1	0	0	0	0	1	1	0	0	0	0	1	1	2
282	2	58	0	0	0	0	1	0	1	1	2	1	8	30	1	10	2	2	1	1	0	0	0	0	0	0	0	0	1	1	0	0	1	1	0	0	1	2	0	0	1	1	0	0	1	1	0	0	0
283	2	52	0	0	0	0	0	0	0	1	0	1	6	30	1	5	2	2	0	0	0	0	0	0	0	0	0	0	1	1	1	1	1	1	0	0	1	1	1	1	1	1	0	0	1	1	1	1	0
285	2	48	0	0	0	0	1	0	1	1	2	1	7	18	1	5	2	2	1	1	1	1	0	0	0	0	0	0	1	1	1	1	2	2	0	0	1	1	0	0	0	0	1	1	0	0	0	0	1
289	2	50	0	0	0	1	1	0	1	1	3	1	7	30	1	10	2	4	1	1	0	0	0	0	0	0	0	0	0	0	0	0	0	0	1	1	0	0	0	0	1	1	2	2	0	0	1	1	2
[truncated: 13 more columns]

## Sheet: Codebook
	ID	Identification number in ascending order
	Sex	1 = Male / 2 = Female
	Dichotomous answer YES/NO	No = 0 / Yes = 1
	Regular use of contact lenses	No = 0 / 1 = Always wear contact lenses / 2 = Sporadic use of contact lenses
	Type of glasses to work	0 = No / 1 = Monofocal distance / 2 = Monofocal near / 3 = General progressive / 4 = Occupational progressive / 5 = Bifocal
	Type of work	1 = University / 2 = Hospital
	Air conditioning	1 = Never or rarely / 2 = Almost always or always
	F1 - F16	0 = Never / 1 = Occasionally / 2 = Often or always
	I1 - I16	0 = No / 1 = Moderate / 2 = Intense
